# Supplementary material for: Brief communication: Comparison of in situ ephemeral snow depth measurements over a mixed-use temperate forest landscape
Source: Copernicus journal article supplement (doi:10.5194/tc-17-3435-2023), 2023-08-23
Supplement: Supplementary file 1 [file tc-17-3435-2023-supplement.zip]

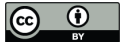

## *Supplement of*

# **Brief communication: Comparison of in situ ephemeral snow depth measurements over a mixed-use temperate forest landscape**

**Holly Proulx et al.**

*Correspondence to:* Jennifer M. Jacobs ([jennifer.jacobs@unh.edu](mailto:jennifer.jacobs@unh.edu))

- tc-17-3435-2023-supplement-title-page.pdf
- \_\_MACOSX
  - .\_tc-2023-36-supplement-version2 proofs
  - tc-2023-36-supplement-version2 proofs
    - \* .\_DS\_Store
    - \* .\_Snow Depth Raw Data All wo T1 2\_24\_21.xlsx
    - \* .\_Table S1 111522.pdf
- tc-2023-36-supplement-version2 proofs
  - .DS\_Store
  - Snow Depth Raw Data All wo T1 2\_24\_21.xlsx
  - Table S1 111522.pdf

The copyright of individual parts of the supplement might differ from the article licence.
